# Supplementary material for: Kidney micro-organoids in suspension culture as a scalable source of human pluripotent stem cell-derived kidney cells
Source: PubMed Central journal article supplement (PMC6432662; doi:10.1242/dev.172361), 2019-03-07
Supplement: develop-146-172361-s1.pdf [file develop-146-172361-s1.pdf]

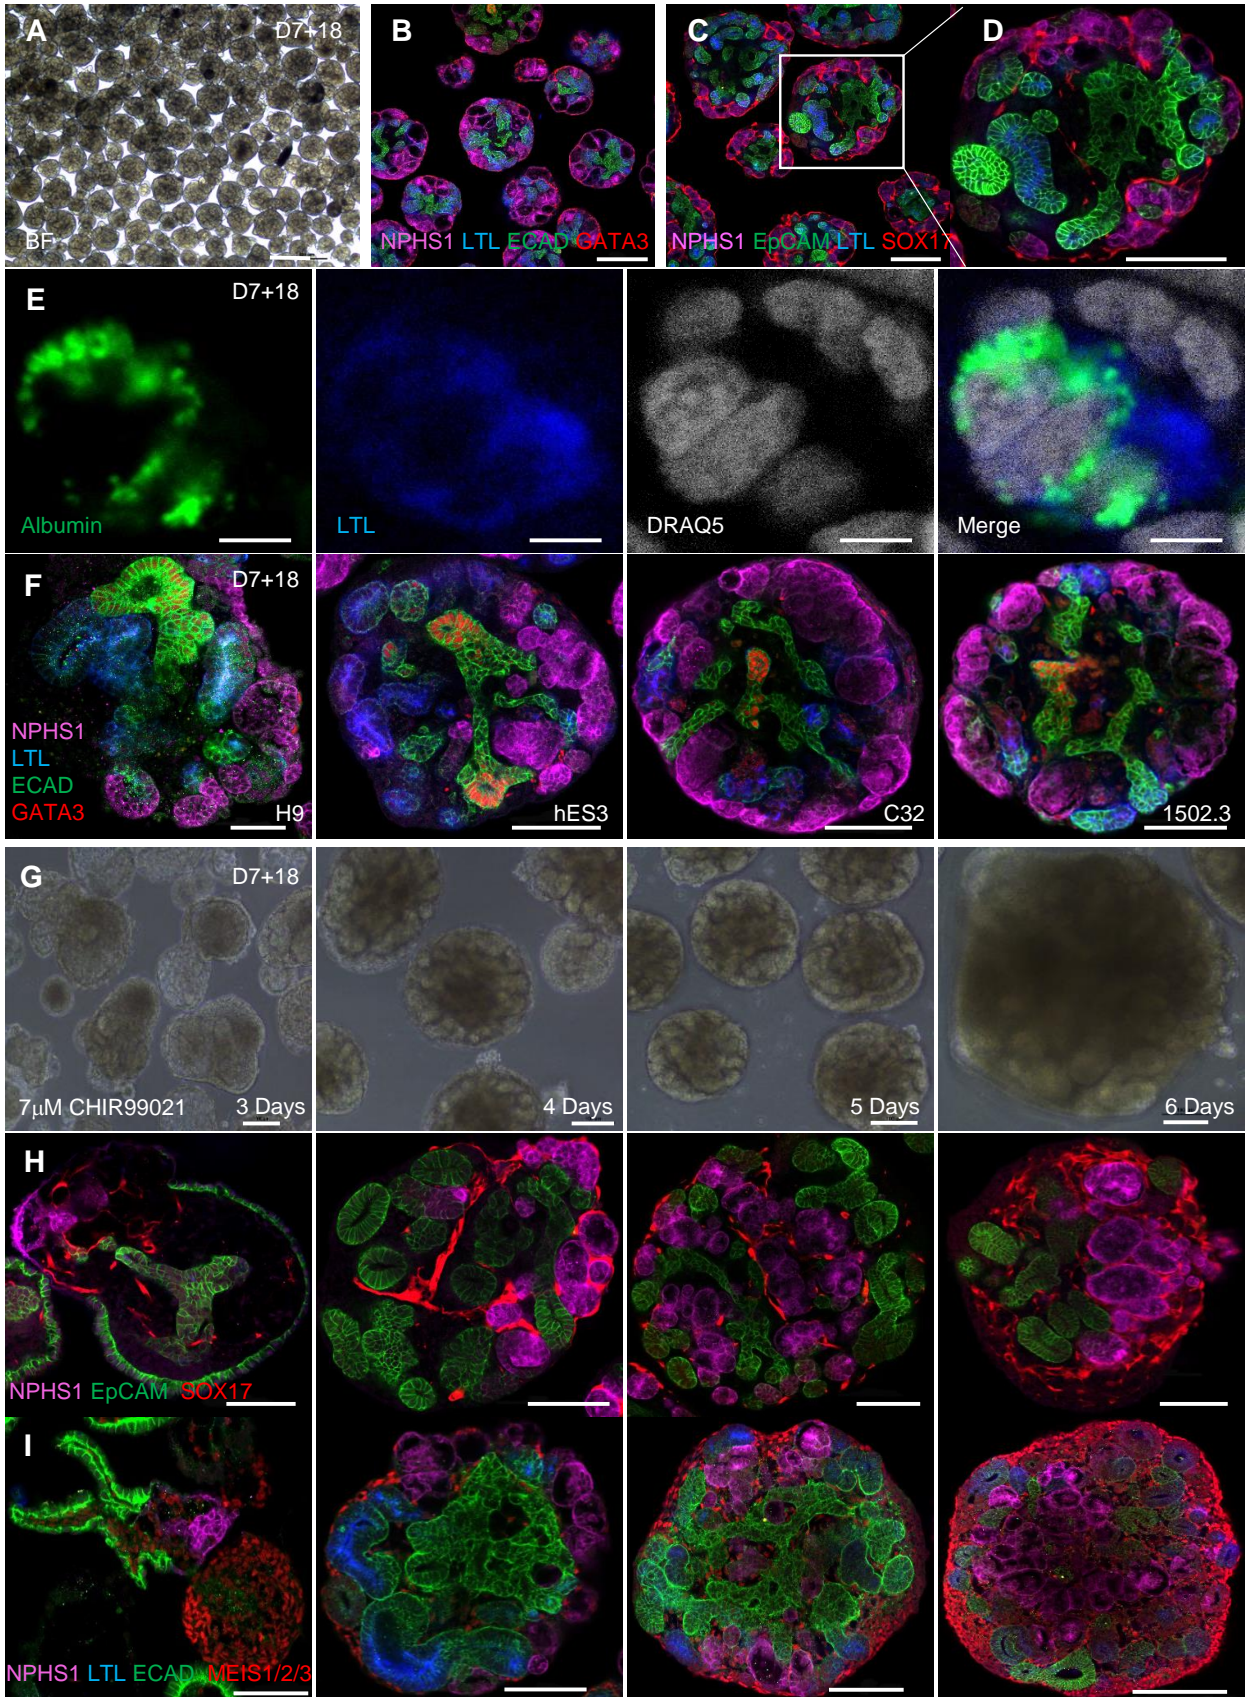

**Fig. S1:** Generation of micro-kidney organoids in suspension culture and initial Wnt signalling is important for kidney organoid development and maturation. **(A)** Bright field images showing uniform kidney micro-organoids on Day 7+18 (scale 500  $\mu\text{m}$ ). **(B, C and D)** Immunofluorescence and confocal images of micro-organoids showing formation of nephron segments independent of micro-organoid size and shape, including development of vascular structures (scale 100  $\mu\text{m}$ ). **(E)** Confocal image of micro-kidney organoid tubules on Day 7+18 showing FITC albumin uptake (scale 5 $\mu\text{m}$ ). **(F)** Confocal images of micro-kidney organoids generated using 4 different cell lines, including hES (H9 GAPTrap Luc2, hES3 SOX17mCherry) and iPS (CRL1502.C32 and CRL1502.3) on Day 7+18 with antibodies labelling different nephron segments (scale 50  $\mu\text{m}$ ). **(G, H and I)** hES3 SOX17mCherry derived micro-organoids generated after exposure to different days of initial 7  $\mu\text{M}$  CHIR99021 for 3, 4, 5 and 6 days treatment showing bright field (G, scale 100  $\mu\text{m}$ ) and immunofluorescence confocal images showing SOX17+ vasculature **(H)** and MEIS1/2/3+ stroma **(I)** (scale 100  $\mu\text{m}$ )

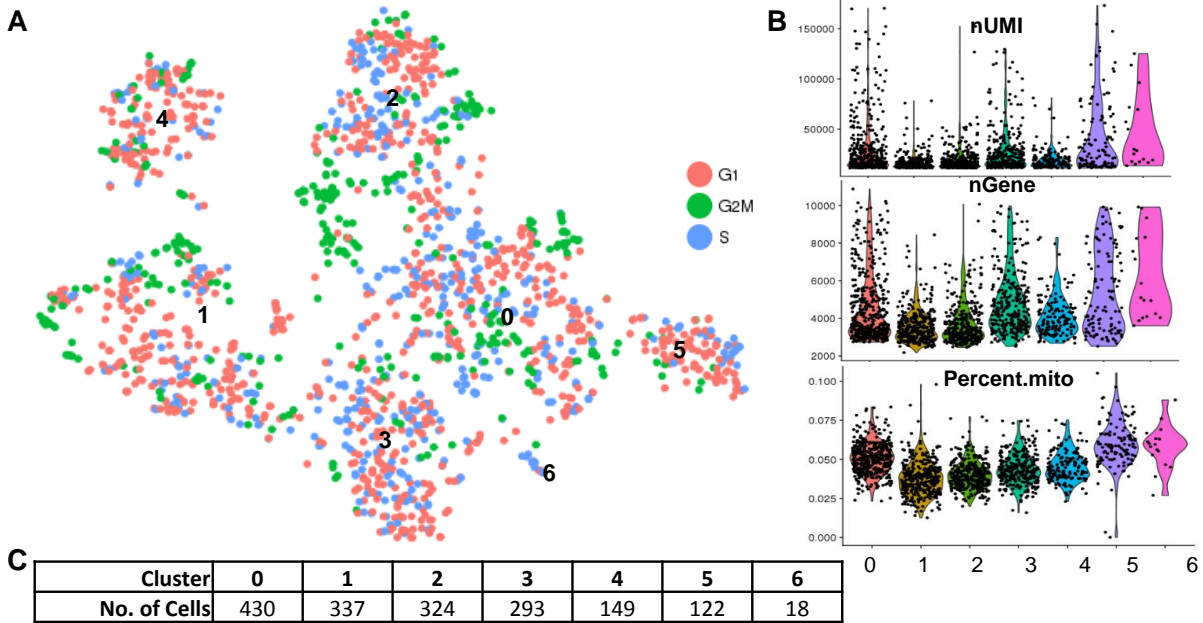

**D**

| Cluster | GO biological process complete                                                                          | Go Term    | Fold Enrichment | FDR      |
|---------|---------------------------------------------------------------------------------------------------------|------------|-----------------|----------|
| 0       | pattern specification involved in pronephros development                                                | GO:0039017 | > 100           | 0.01     |
|         | pronephric field specification                                                                          | GO:0039003 | > 100           | 0.01     |
|         | negative regulation of mesenchymal cell apoptotic process involved in metanephric nephron morphogenesis | GO:0072305 | > 100           | 0.01     |
| 1       | metanephric glomerular capillary formation                                                              | GO:0072277 | 80.16           | 3.36E-02 |
|         | metanephric glomerulus vasculature morphogenesis                                                        | GO:0072276 | 80.16           | 3.35E-02 |
|         | metanephric glomerulus morphogenesis                                                                    | GO:0072275 | 80.16           | 3.34E-02 |
| 2       | regulation of cellular response to X-ray                                                                | GO:2000683 | > 100           | 5.35E-03 |
|         | endodermal digestive tract morphogenesis                                                                | GO:0061031 | > 100           | 7.99E-03 |
|         | positive regulation of ureteric bud formation                                                           | GO:0072107 | > 100           | 1.14E-02 |
| 3       | pattern specification involved in pronephros development                                                | GO:0039017 | 99.73           | 1.80E-02 |
|         | pronephric field specification                                                                          | GO:0039003 | 99.73           | 1.80E-02 |
|         | negative regulation of mesenchymal cell apoptotic process involved in metanephric nephron morphogenesis | GO:0072305 | 99.73           | 1.80E-02 |
| 4       | positive regulation of mesenchymal cell apoptotic process                                               | GO:2001055 | 96.97           | 3.43E-02 |
|         | negative regulation of neuromuscular junction development                                               | GO:1904397 | 96.97           | 3.41E-02 |
|         | corticospinal tract morphogenesis                                                                       | GO:0021957 | 48.48           | 6.53E-03 |
| 5       | regulation of presynaptic membrane organization                                                         | GO:1901629 | > 100           | 2.85E-02 |
|         | negative regulation of mesenchymal cell apoptotic process involved in nephron morphogenesis             | GO:0072040 | 85.31           | 2.71E-03 |
|         | regulation of mesenchymal cell apoptotic process involved in nephron morphogenesis                      | GO:0072039 | 85.31           | 2.69E-03 |
| 6       | neuropilin signaling pathway                                                                            | GO:0038189 | 32.61           | 1.48E-02 |
|         | glomerular capillary formation                                                                          | GO:0072104 | 26.09           | 2.17E-02 |
|         | glomerulus vasculature morphogenesis                                                                    | GO:0072103 | 26.09           | 2.16E-02 |

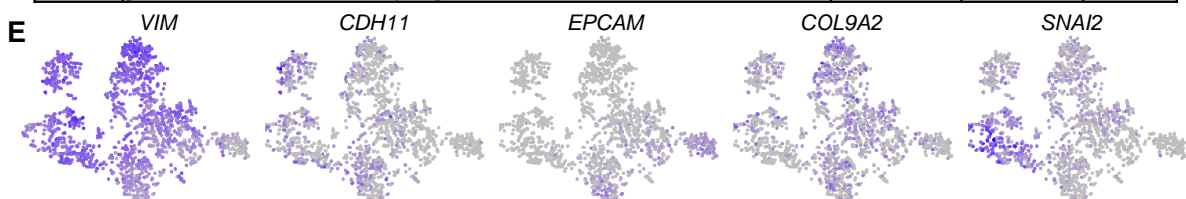

**Fig. S2:** **(A)** t-SNE plot coloured by cell cycle stages in the different clusters. **(B)** Violin plots showing the number of UMIs, expressed genes and percentage mitochondrial genes in each cluster. **(C)** Number of cells in individual clusters. **(D)** Associated GO biological process terms for the significantly up-regulated genes within different clusters. **(E)** t-SNE plots for additional selected marker genes related to nephrons.

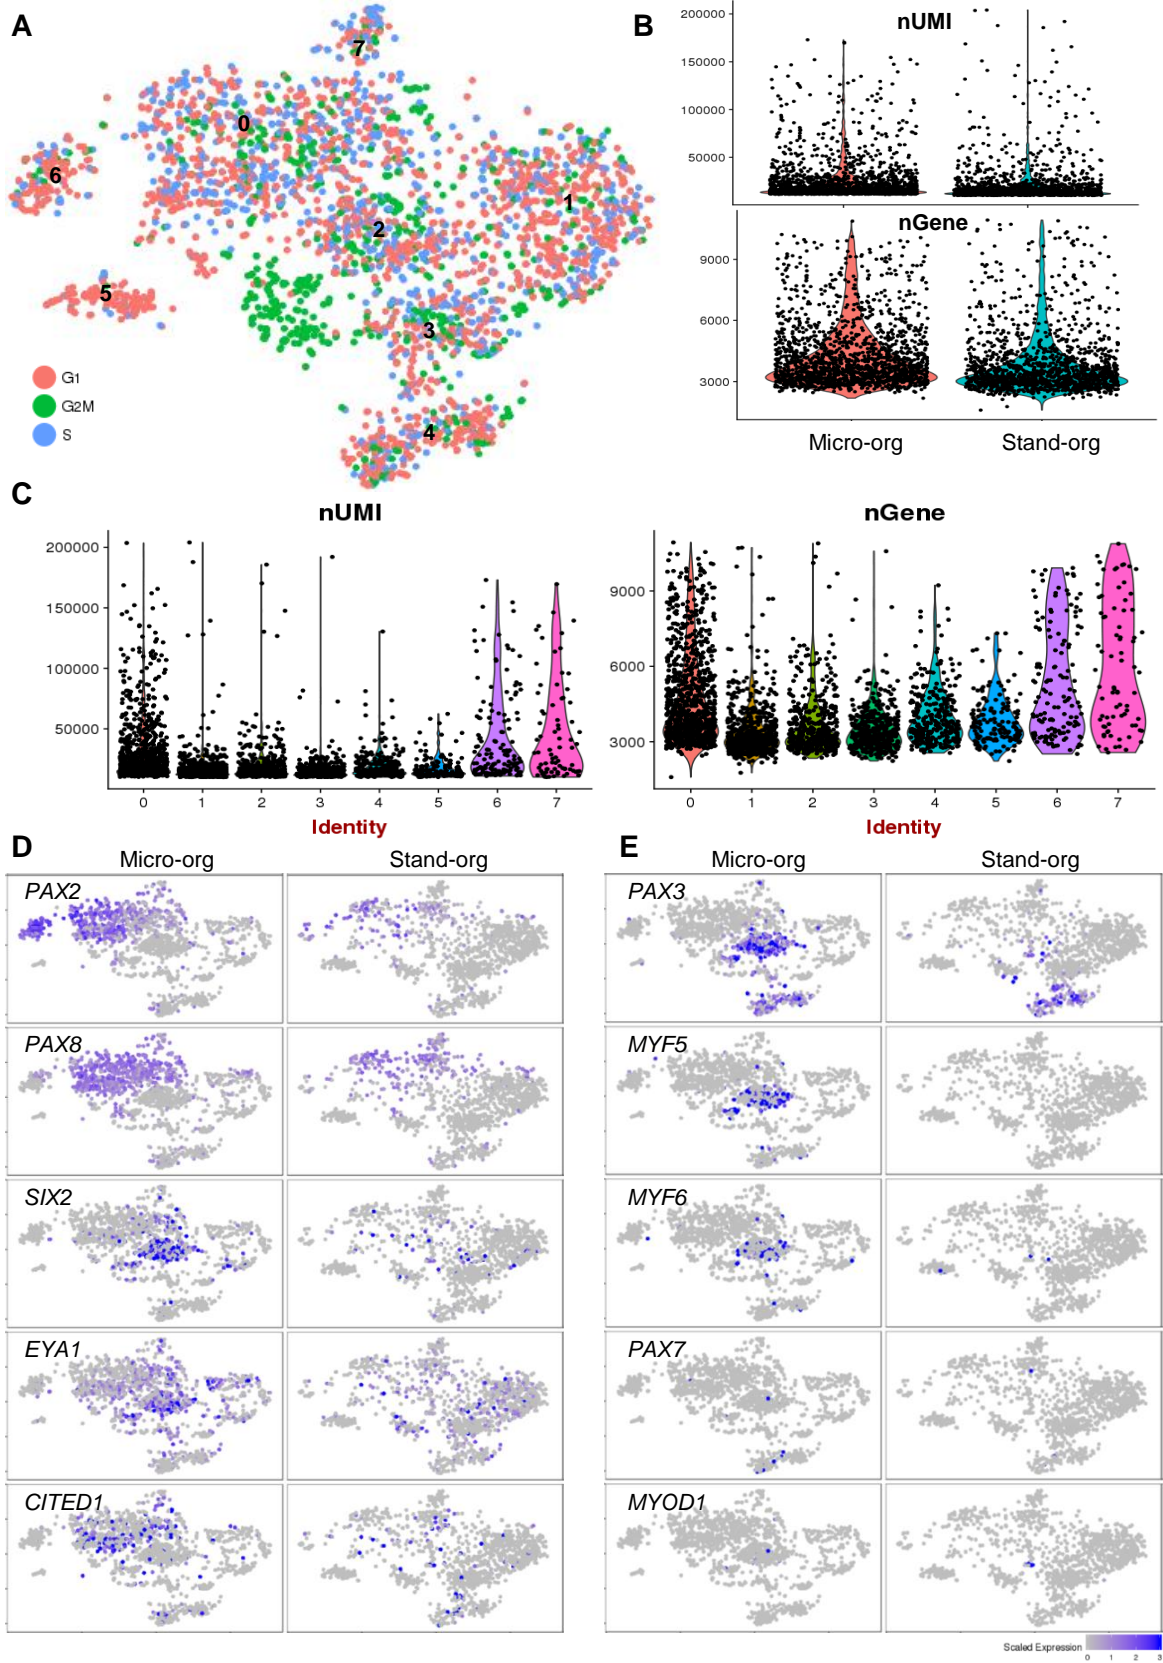

**Fig. S3:** **(A)** t-SNE plot coloured by cell cycle stages in the integrated analysis of micro- and standard organoid scRNA-Seq data. **(B)** Violin plots for the number of UMIs and expressed genes in the standard and micro-organoid data. **(C)** Number of UMIs and genes within clusters. **(D and E)** t-SNE feature plots for nephron marker genes in standard and micro-organoid scRNA-Seq data.

Fig. S4

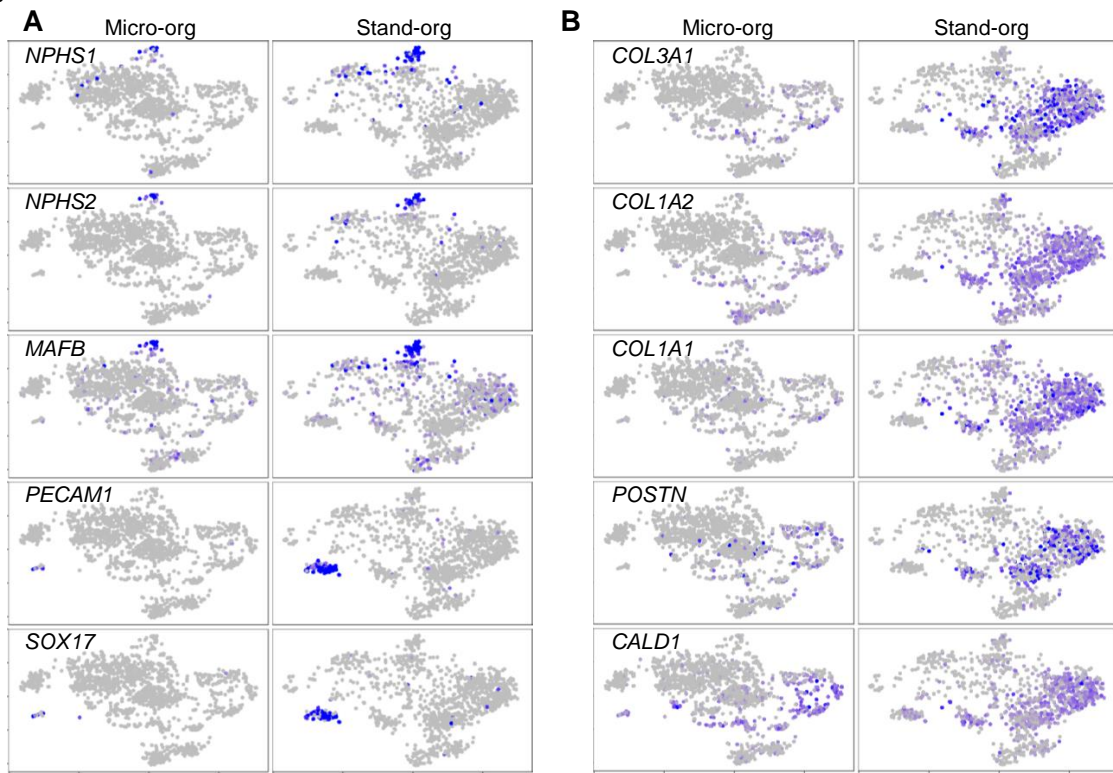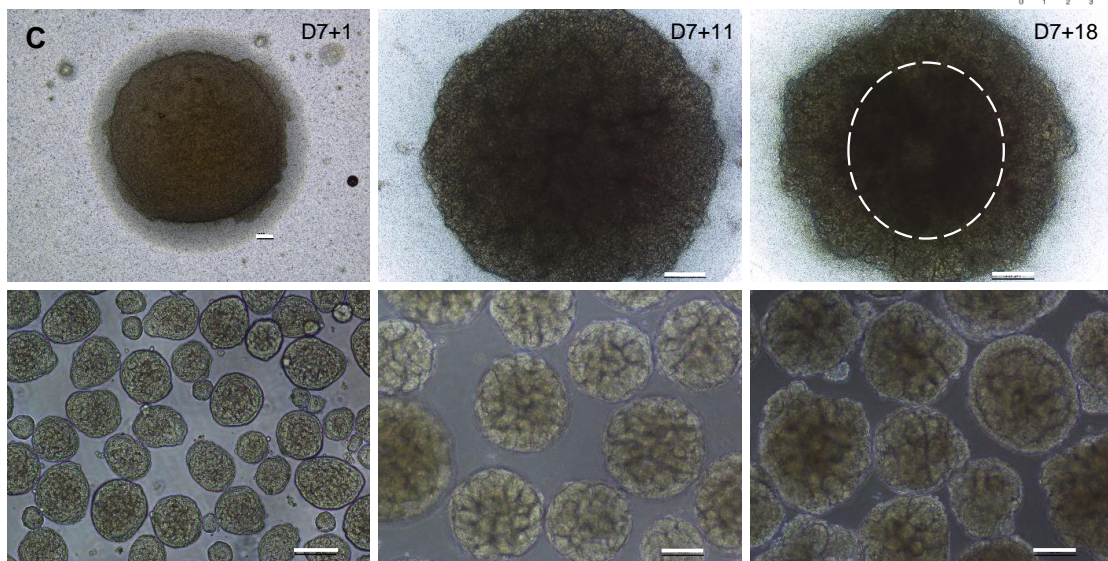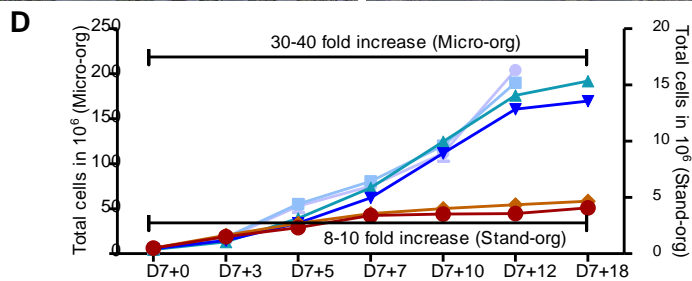

**Fig. S4: (A and B)** t-SNE plots for cell type marker genes in standard and micro-organoid. *NPHS1*, *NPHS2* and *MAFB* mark podocytes, *PECAM1* and *SOX17* mark endothelial cells, *COL3A1*, *COL1A2*, *POSTN*, *COL1A1*, *LGALS1*, and *GALD1* mark stroma. **(C)** Bright field images of organoid development across time course among standard organoid (upper panels) and micro-organoids (lower panels) (scale 200  $\mu\text{m}$ ). **(D)** Total number of organoid-derived kidney cells over time within kidney micro-organoids and standard kidney organoids.



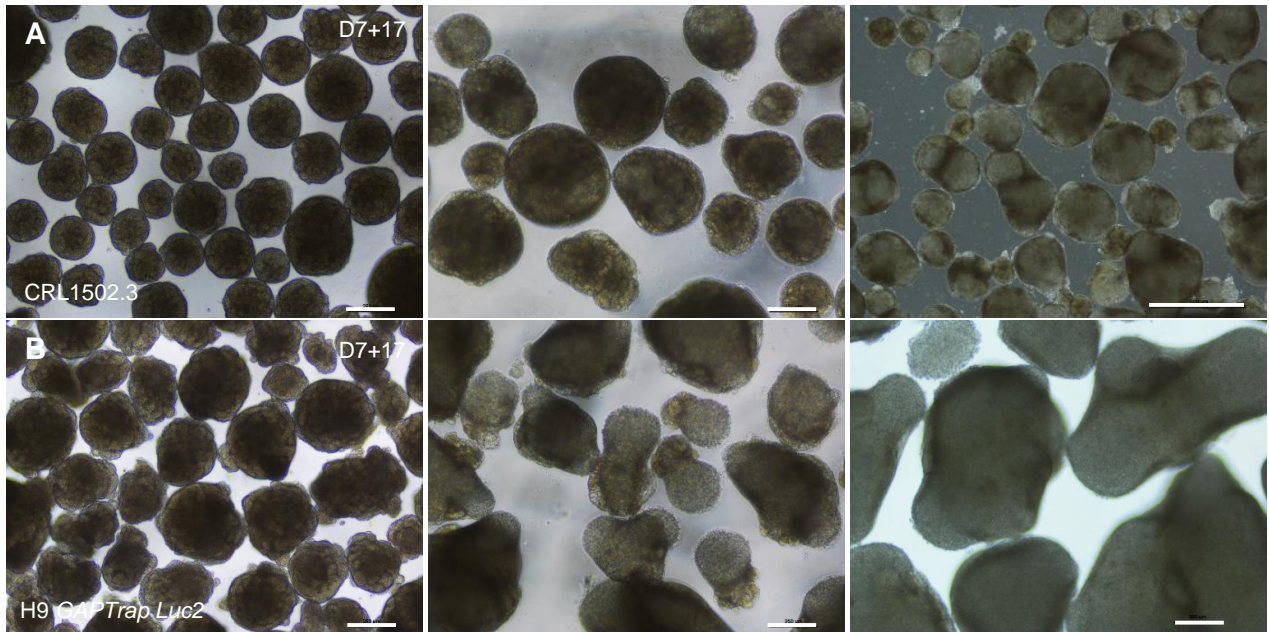

**Fig. S5: (A and B)** Bright-field images of extended culture of kidney micro-organoids in suspension using CRL1502.3 and H9 *GAPDH Luc2* cell lines (scale 250  $\mu\text{m}$ ),

**Table S1**

[Click here to Download Table S1](#)

**Table S2. Human gene specific primers used in this study.**

|                     | Forward                  | Reverse                |
|---------------------|--------------------------|------------------------|
| <b><i>GAPDH</i></b> | AGCCACATCGCTCAGACAC      | GCCCAATACGACCAAATCC    |
| <b><i>PAX2</i></b>  | AGGACCAGTTTCCATAGACTGC   | GGGAGGGGGCATCAAGTA     |
| <b><i>WT1</i></b>   | TGTCAGCGAAAGTTCTCCG      | GCTGAAGGGCTTTTACCTG    |
| <b><i>LHX1</i></b>  | ATGCAACCTGACCGAGAAGT     | CAGGTCGCTAGGGGAGATG    |
| <b><i>OSR1</i></b>  | ATAGAACCTGTGGGTCACAAGGAC | GGGACAATGTTGGAGAGGTGG  |
| <b><i>SIX1</i></b>  | AAAGGGAAGGAGAACAAGGATAG  | GGAGCCTACATGATTACTGGG  |
| <b><i>EYA1</i></b>  | ATCTAACCCAGCCGCATAGC     | GTGCCATTGGGAGTCATGGA   |
| <b><i>WNT11</i></b> | TGAACGACTCGGAACTCGTC     | CGCTTCCGTTGGATGTCTTG   |
| <b><i>GATA3</i></b> | GCCCCTCATTAAAGCCCAAG     | TTGTGGTGGTCTGACAGTTCTG |
| <b><i>C-RET</i></b> | CCGCACACGGCTGCATGAGA     | AAGGTGCCTGGGGGTCTGGTT  |
| <b><i>FOXD1</i></b> | GACTGTGAGTTCATCAGCGGC    | TGACGAAGCAGCGTTGAGCGA  |
| <b><i>NPHS1</i></b> | GTCTGCACTGTCGATGCCAATC   | CCAGTTGGCATGGTGAATCCG  |
| <b><i>NPHS2</i></b> | CTGTGAGTGGCTTCTTGTCTC    | CCTTTGGCTCTTCCAGGAAGCA |
| <b><i>SYNPO</i></b> | TAGGGTGTGGGCTGGATGTCA    | AGGAGGTGAGATGCAGCACACT |
| <b><i>CUBN</i></b>  | AACTTCCTAATCCCCAGCGG     | GTCCACCTCCTCAGTTCCTG   |
| <b><i>HNF4A</i></b> | ACCCTCGTCGACATGGACA      | GCCTTCTGATGGGGACGTG    |
| <b><i>CD31</i></b>  | AAACCACTGCAGAGTACCAG     | GCCTCTTTCTCCAGTGTGT    |
| <b><i>LAMA5</i></b> | AACCAGATGAGCATCACATTCTG  | ACAGTGTTGCGCGTCTCCGTAT |
| <b><i>CDH6</i></b>  | AGATGCTGCAAGGAATCCTGTC   | CCATAGCAGTGTCTCGGTCAA  |
| <b><i>CDH1</i></b>  | CACCCTGGCTTTGACGCCGA     | AAACGGAGGCCTGATGGGGCG  |
